# Supplementary material
Source: PubMed Central journal article supplement (PMC5856627)
Supplement: NIHMS935326-supplement-1.pdf [file NIHMS935326-supplement-1.pdf]

| <b>Gene sets and pathways</b>                 | <b>MsigDB set name</b>               | <b>p value</b>       |
|-----------------------------------------------|--------------------------------------|----------------------|
| <b>Circadian rhythm/photoreceptor</b>         | KEGG_CIRCADIAN_RHYTHM_MAMMAL         | 2.79E <sup>-11</sup> |
| <b>c-MYC pathway</b>                          | PID_MYC_REPRESS_PATHWAY              | 1.33E <sup>-9</sup>  |
| <b>Steroid biosynthesis</b>                   | KEGG_STEROID_BIOSYNTHESIS            | 2.94E <sup>-9</sup>  |
| <b>Wnt/<math>\beta</math>-catenin pathway</b> | ST_WNT_BETA_CATENIN_PATHWAY          | 1.06E <sup>-8</sup>  |
| <b>Hedgehog pathway</b>                       | PID_HEDGEHOG_GLI_PATHWAY             | 8.49E <sup>-7</sup>  |
| <b>Netrin pathway</b>                         | REACTOME_NETRIN1_SIGNALING           | 5.05E <sup>-7</sup>  |
| <b>p53 pathway</b>                            | BIOCARTA_P53_PATHWAY                 | 4.61E <sup>-6</sup>  |
| <b>Ras pathway</b>                            | PID_RAS_PATHWAY                      | 7.54E <sup>-6</sup>  |
| <b>Fatty Acyl-CoA Biosynthesis</b>            | REACTOME_FATTY_ACYL_COA_BIOSYNTHESIS | 1.73E <sup>-7</sup>  |
| <b>Notch 2 pathway</b>                        | REACTOME_SIGNALING_BY_NOTCH2         | 8.31E <sup>-5</sup>  |
| <b>Erk pathway</b>                            | REACTOME_SIGNALLING_TO_ERKS          | 3.15E <sup>-4</sup>  |
| <b>Cholesterol biosynthesis</b>               | REACTOME_CHOLESTEROL_BIOSYNTHESIS    | 3.40E <sup>-4</sup>  |

**Table S1.** Gene sets and pathways with selective enrichment among MB subtypes.
