# Supplementary material
Source: PubMed Central journal article supplement (PMC5856627)
Supplement: NIHMS935326-supplement-2.pdf [file NIHMS935326-supplement-2.pdf]

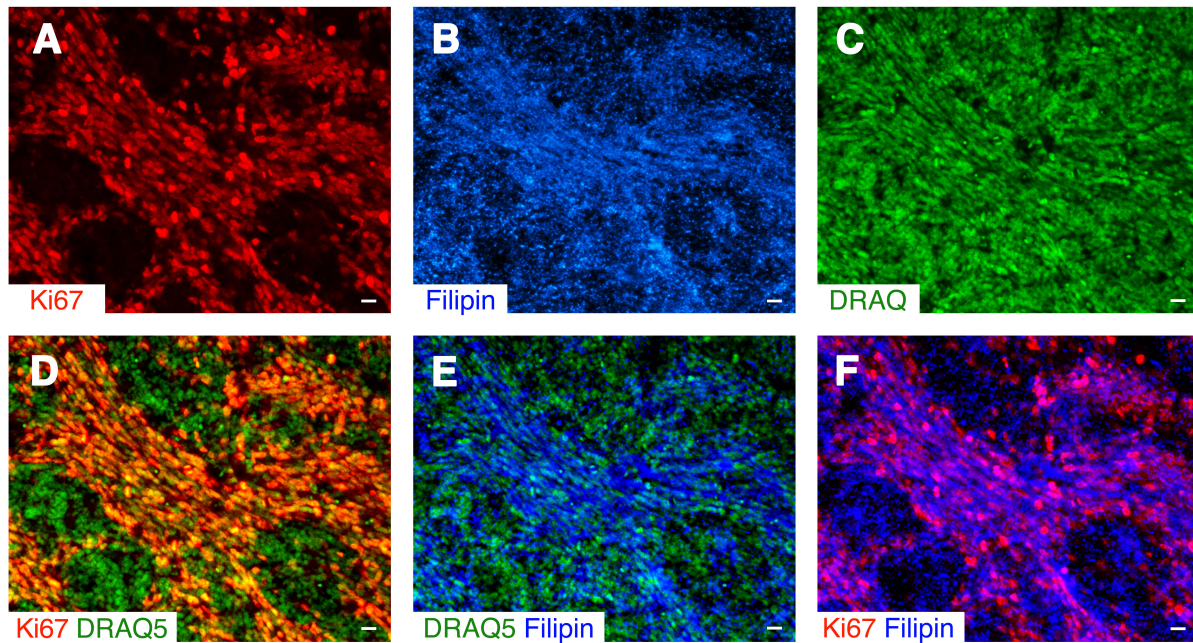

**Fig. S1. Cholesterol availability influences proliferation of *Ptch1*<sup>+/-</sup> MB proliferation cells.**

Immunofluorescence analysis of Ki67 (A), filipin (B) and DRAQ5 (C) in tumor tissue from *Math1-CreER<sup>T2</sup>/Nsdhl<sup>fl/fl</sup>/Ptch1<sup>+/-</sup>* mice after tamoxifen treatment. Merged photographs of Ki67 and DRAQ5 (D), DRAQ5 and filipin (E), Ki67 and filipin (F). DRAQ5 was used to counterstain cell nuclei. Proliferating MB cells (Ki67 positive) were predominately located in cholesterol-enriched regions. Scale bars 10  $\mu$ m.
