# Supplementary material
Source: PubMed Central journal article supplement (PMC5856627)
Supplement: NIHMS935326-supplement-4.pdf [file NIHMS935326-supplement-4.pdf]

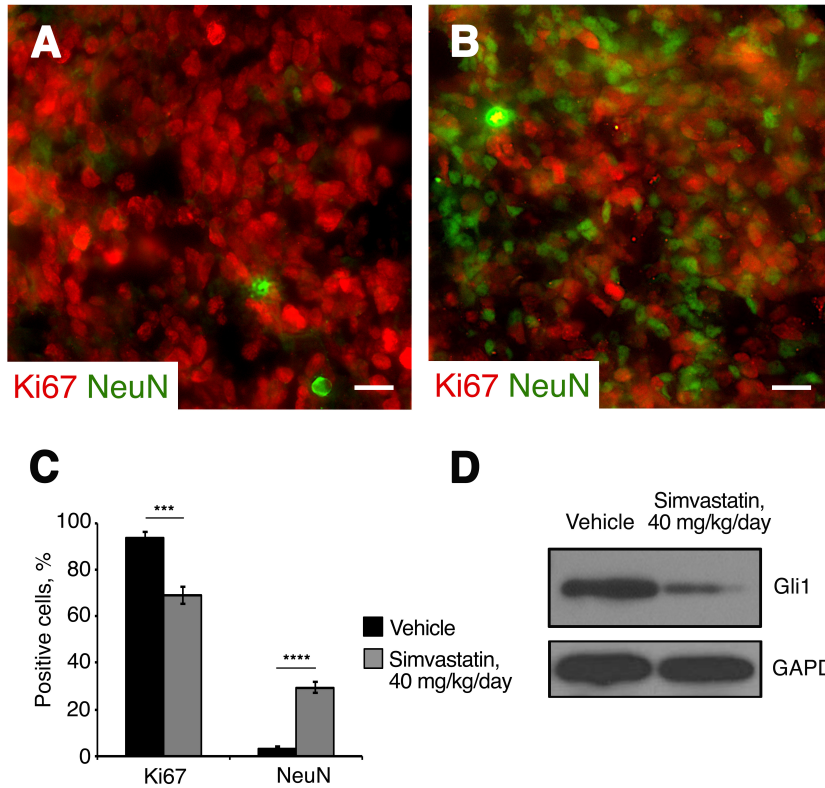

**Fig. S3.** Simvastatin inhibits MB cell proliferation in *Ptch1*<sup>+/-</sup> mice.

(A-B) Sections of endogenous *Ptch1*<sup>+/-</sup> MB after treatment with vehicle (A) or 40 mg/kg/day simvastatin (B), were immunostained for Ki67 and NeuN. Scale bars 10  $\mu$ m. (C) Percentage of proliferating (Ki67+) and differentiating (NeuN+) cells in MB tissue after drug treatment. (D) MB tissues after drug treatment were harvested for analyzing Gli1 protein expression by western blotting.

Significance asterisk key: p value < 0.05 (\*), p<0.01 (\*\*), p<0.001 (\*\*\*), p<0.0001 (\*\*\*\*).
