# Supplementary material
Source: PubMed Central journal article supplement (PMC5856627)
Supplement: NIHMS935326-supplement-5.pdf [file NIHMS935326-supplement-5.pdf]

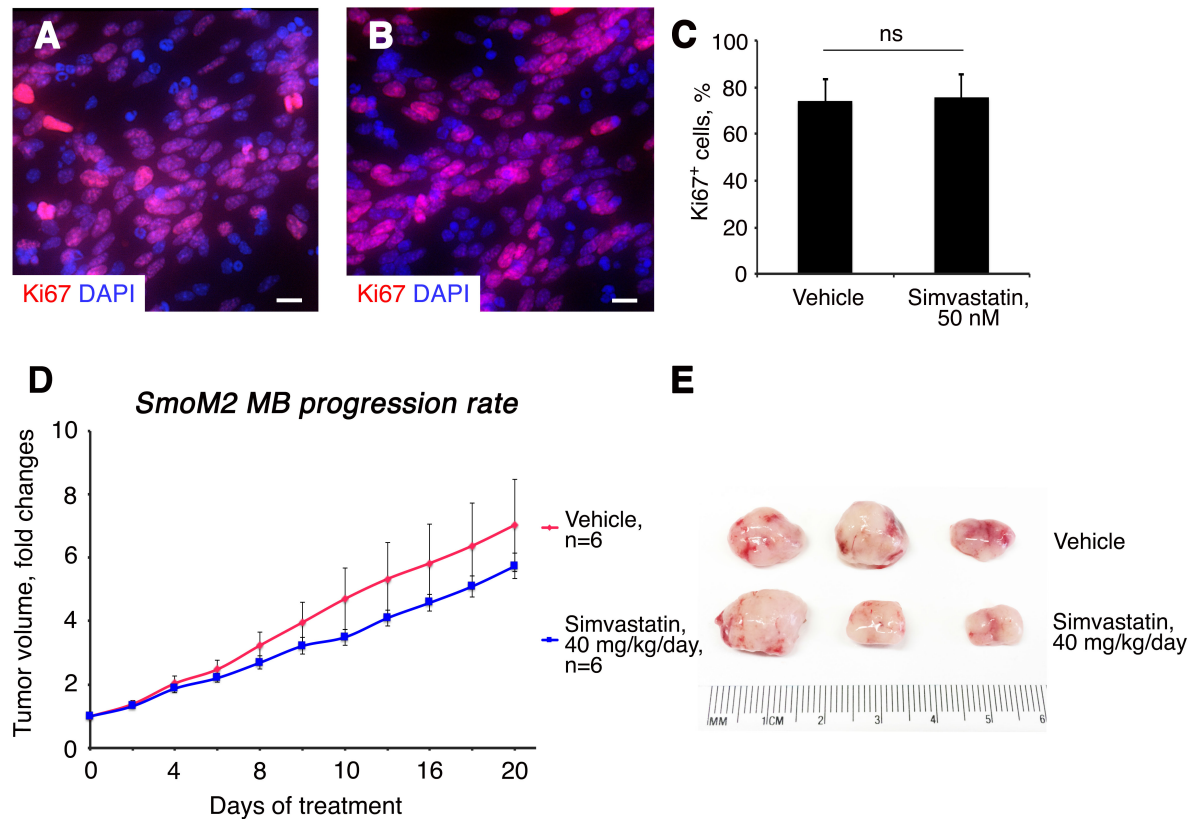

**Fig. S4. SmoM2 MB cells are resistant to simvastatin treatment.**

(A-C) MB cells from *Math1-Cre/SmoM2* mice were immunostained against Ki67 after treatment with simvastatin or vehicle control for 48 hours (A-B). MB cells were counterstained with DAPI. Scale bars 10  $\mu$ m. No difference in MB cell proliferation was observed between treatment with simvastatin and control (C). (D) Growth rate of subcutaneous MB cells from *Math1-Cre/SmoM2* mice following treatment with simvastatin or vehicle control. No significant difference was observed in the tumor growth after simvastatin and vehicle treatment. (E) The comparable size of subcutaneous MB from *Math1-Cre/SmoM2* mice after treatment with simvastatin or vehicle control.
